# Supplementary material for: Limited sterile processing capabilities for safe surgery in low-income and middle-income countries: experience in the Republic of Congo, Madagascar and Benin
Source: PubMed Central journal article supplement — BMJ Glob Health. 2017 Sep 29;2(Suppl 4):e000428. doi: 10.1136/bmjgh-2017-000428 (PMC5717920; doi:10.1136/bmjgh-2017-000428), 2017-09-29
Supplement: bmjgh-2017-000428supp001.pdf [file bmjgh-2017-000428supp001.pdf]

# Sterile Processing Assessment and Check List

Date (mm/dd/yyyy): \_\_\_\_\_

Name of Hospital: \_\_\_\_\_

Name of Hospital Director: \_\_\_\_\_

Contact information for Hospital Director: \_\_\_\_\_

Head of Sterile Processing (SP) services: \_\_\_\_\_

Job Title: \_\_\_\_\_

Contact Information: \_\_\_\_\_

## General Hospital and Staff Information

Number of operating rooms

Average number of surgeries performed weekly

Number of staff involved in SP

Number of staff who have received classroom training in SP

Number of staff who have received on-the-job training in SP

List any organizations that have provided previous SP training: \_\_\_\_\_

### Number

|  |
|--|
|  |
|  |
|  |
|  |
|  |

## SP Infection Control & General Info

SP Staff wear PPE when cleaning contaminated items

The following type of PPE are available to SP staff:

gloves

gowns

head covers

protective eye wear

masks

booties

Soap is available to SP staff for handwashing

Clean running water available for handwashing

The SP areas are cleaned on a scheduled rotating basis

There are sharps containers available

Sharps are incinerated on the premises

There are signs restricting access of unauthorized staff to the SP area

There are educational posters on the wall which provide instruction to SP staff

### Yes

### No

| Yes | No |
|-----|----|
|     |    |
|     |    |
|     |    |
|     |    |
|     |    |
|     |    |
|     |    |
|     |    |

## Transport of contaminated items from Point of Use areas

Contaminated instruments flow from dirty to clean areas during transportation without cross contamination

Contaminated items are covered during transportation from the theatre to the decontamination area

Disposable sharps are removed by the Theatre Nurse at point of use

### Yes

### No

| Yes | No |
|-----|----|
|     |    |
|     |    |
|     |    |



Biological indicators being used at least monthly  
A record sheet is available to track the instruments going in and out of the sterilizer

|  |  |
|--|--|
|  |  |
|  |  |

**Sterile Storage of medical devices**

Instruments are stored in an enclosed cabinet or room after sterilization  
Sterilized instruments are stored away from decontamination area and away from open windows

| Yes | No |
|-----|----|
|     |    |
|     |    |

**Comments**
